# Supplementary material for: Introducing a flexible tetracarboxylic acid linker into functional coordination polymers: synthesis, structural traits, and photocatalytic dye degradation
Source: Royal Society of Chemistry journal article supplement (doi:10.1039/d0nj03628e), 2020-01-01
Supplement: d0nj03628e1.pdf [file d0nj03628e1.pdf]

## Electronic Supplementary Information (ESI)

# Introducing a Flexible Tetracarboxylic Acid Linker into Functional Coordination Polymers: Synthesis, Structural Traits, and Photocatalytic Dye Degradation

Jinwei Chen,<sup>a</sup> Yu Li,<sup>a,\*</sup> Jinzhong Gu,<sup>b</sup> Marina V. Kirillova<sup>c</sup> and Alexander M. Kirillov<sup>c,d,\*</sup>

<sup>a</sup>*School of Light Chemical Engineering / Guangdong Research Center for Special Building Materials and Its Green Preparation Technology, Guangdong Industry Polytechnic, Guangzhou, 510300, People's Republic of China, Fax: +86-20-61230629; Tel: +86-20-61230629; E-mail: liyuletter@163.com*

<sup>b</sup>*College of Chemistry and Chemical Engineering, Lanzhou University, Lanzhou, 730000, People's Republic of China*

<sup>c</sup>*Centro de Química Estrutural and Departamento de Engenharia Química, Instituto Superior Técnico, Universidade de Lisboa, Av. Rovisco Pais, 1049-001 Lisbon, Portugal, Tel.: +351 218419396, E-mail: kirillov@tecnico.ulisboa.pt*

<sup>d</sup>*Research Institute of Chemistry, Peoples' Friendship University of Russia (RUDN University), 6 Miklukho-Maklaya st., Moscow, 117198, Russian Federation*

*†Electronic Supplementary Information (ESI) contains: Fig. S1: TGA curves, Fig. S2: PXRD patterns, Fig. S3: diffuse reflectance UV-vis spectra, Figs. S4–S8: absorption spectra of the MB solutions in catalytic tests including kinetic data, Figs. S9–S11: additional topological views of crystal structures, Tables S1 and S2: selected bonding and H-bonding parameters for 1–5.*

**Table S1** Selected bond lengths (Å) and bond angles (°) for **1–5<sup>a</sup>**.

| <b>1</b>            |            |                     |            |                     |            |
|---------------------|------------|---------------------|------------|---------------------|------------|
| Mn(1)–O(1)          | 2.330(2)   | Mn(1)–O(2)          | 2.362(2)   | Mn(1)–O(3)i         | 2.129(2)   |
| Mn(1)–O(8)ii        | 2.263(2)   | Mn(1)–O(9)ii        | 2.368(2)   | Mn(1)–N(1)          | 2.301(2)   |
| Mn(1)–N(2)          | 2.285(2)   | Mn(2)–O(2)          | 2.306(2)   | Mn(2)–O(4)i         | 2.106(2)   |
| Mn(2)–O(7)ii        | 2.090(2)   | Mn(2)–O(9)ii        | 2.216(2)   | Mn(2)–N(3)          | 2.250(2)   |
| Mn(2)–N(4)          | 2.238(3)   |                     |            |                     |            |
| O(3)i–Mn(1)–O(8)ii  | 86.42(9)   | O(3)i–Mn(1)–N(2)    | 89.65(9)   | N(2)–Mn(1)–O(8)ii   | 139.37(9)  |
| O(3)i–Mn(1)–N(1)    | 135.03(9)  | N(1)–Mn(1)–O(8)ii   | 83.15(8)   | N(1)–Mn(1)–N(2)     | 71.50(9)   |
| O(3)i–Mn(1)–O(1)    | 136.58(8)  | O(1)–Mn(1)–O(8)ii   | 127.40(9)  | N(2)–Mn(1)–O(1)     | 80.33(8)   |
| N(1)–Mn(1)–O(1)     | 81.34(8)   | O(3)i–Mn(1)–O(9)ii  | 93.32(8)   | O(8)ii–Mn(1)–O(9)ii | 56.03(7)   |
| N(2)–Mn(1)–O(9)ii   | 164.55(8)  | N(1)–Mn(1)–O(9)ii   | 115.69(8)  | O(1)–Mn(1)–O(9)ii   | 87.15(7)   |
| O(3)i–Mn(1)–O(2)    | 82.10(7)   | O(8)ii–Mn(1)–O(2)   | 130.30(7)  | N(2)–Mn(1)–O(2)     | 88.90(8)   |
| N(1)–Mn(1)–O(2)     | 135.61(8)  | O(1)–Mn(1)–O(2)     | 55.79(7)   | O(9)ii–Mn(1)–O(2)   | 76.52(7)   |
| O(4)i–Mn(2)–O(7)ii  | 99.73(9)   | O(4)i–Mn(2)–O(9)ii  | 95.65(9)   | O(9)ii–Mn(2)–O(7)ii | 84.06(8)   |
| O(4)i–Mn(2)–N(4)    | 92.63(10)  | N(4)–Mn(2)–O(7)ii   | 104.15(9)  | N(4)–Mn(2)–O(9)ii   | 167.21(9)  |
| O(4)i–Mn(2)–N(3)    | 161.76(9)  | O(7)ii–Mn(2)–N(3)   | 95.59(8)   | O(9)ii–Mn(2)–N(3)   | 95.84(9)   |
| N(4)–Mn(2)–N(3)     | 73.86(10)  | O(4)i–Mn(2)–O(2)    | 80.88(7)   | O(7)ii–Mn(2)–O(2)   | 164.74(8)  |
| O(9)ii–Mn(2)–O(2)   | 80.71(7)   | N(4)–Mn(2)–O(2)     | 91.02(8)   | N(3)–Mn(2)–O(2)     | 87.05(8)   |
| Mn(2)–O(2)–Mn(1)    | 95.87(7)   | Mn(2)–O(9)ii–Mn(1)  | 98.19(8)   |                     |            |
| <b>2</b>            |            |                     |            |                     |            |
| Cd(1)–O(1)          | 2.463(3)   | Cd(1)–O(2)          | 2.423(3)   | Cd(1)–O(3)i         | 2.256(3)   |
| Cd(1)–O(6)ii        | 2.362(3)   | Cd(1)–O(7)ii        | 2.456(4)   | Cd(1)–N(1)          | 2.365(4)   |
| Cd(1)–N(2)          | 2.356(4)   | Cd(2)–O(2)          | 2.422(3)   | Cd(2)–O(4)i         | 2.204(3)   |
| Cd(2)–O(7)ii        | 2.363(3)   | Cd(2)–O(9)ii        | 2.217(3)   | Cd(2)–N(3)          | 2.301(4)   |
| Cd(2)–N(4)          | 2.316(4)   |                     |            |                     |            |
| O(3)i–Cd(1)–N(2)    | 91.37(14)  | O(3)i–Cd(1)–O(6)ii  | 86.54(13)  | O(6)ii–Cd(1)–N(2)   | 140.51(15) |
| N(1)–Cd(1)–O(3)i    | 136.99(15) | N(2)–Cd(1)–N(1)     | 70.14(14)  | O(6)ii–Cd(1)–N(1)   | 84.89(13)  |
| O(3)i–Cd(1)–O(2)    | 81.80(12)  | O(2)–Cd(1)–N(2)     | 87.00(13)  | O(6)ii–Cd(1)–O(2)   | 131.41(13) |
| O(2)–Cd(1)–N(1)     | 132.87(11) | O(3)i–Cd(1)–O(7)ii  | 91.94(13)  | N(2)–Cd(1)–O(7)ii   | 164.93(13) |
| O(6)ii–Cd(1)–O(7)ii | 54.41(13)  | N(1)–Cd(1)–O(7)ii   | 116.06(13) | O(2)–Cd(1)–O(7)ii   | 78.94(11)  |
| O(3)i–Cd(1)–O(1)    | 134.80(12) | O(1)–Cd(1)–N(2)     | 79.35(14)  | O(6)ii–Cd(1)–O(1)   | 127.55(13) |
| N(1)–Cd(1)–O(1)     | 81.09(13)  | O(1)–Cd(1)–O(2)     | 53.83(10)  | O(1)–Cd(1)–O(7)ii   | 87.92(12)  |
| O(4)i–Cd(2)–O(9)ii  | 97.36(13)  | O(4)i–Cd(2)–N(3)    | 161.55(14) | N(3)–Cd(2)–O(9)ii   | 99.18(13)  |
| O(4)i–Cd(2)–N(4)    | 94.63(15)  | O(9)ii–Cd(2)–N(4)   | 109.05(14) | N(4)–Cd(2)–N(3)     | 72.24(15)  |
| O(4)i–Cd(2)–O(7)ii  | 96.22(14)  | O(7)ii–Cd(2)–O(9)ii | 80.59(12)  | N(3)–Cd(2)–O(7)ii   | 94.51(13)  |
| N(4)–Cd(2)–O(7)ii   | 164.43(12) | O(2)–Cd(2)–O(4)i    | 80.13(12)  | O(2)–Cd(2)–O(9)ii   | 160.81(12) |
| N(3)–Cd(2)–O(2)     | 86.84(12)  | N(4)–Cd(2)–O(2)     | 90.13(13)  | O(2)–Cd(2)–O(7)ii   | 80.79(11)  |
| Cd(1)–O(2)–Cd(2)    | 95.61(10)  | Cd(1)–O(7)ii–Cd(2)  | 96.25(12)  |                     |            |
| <b>3</b>            |            |                     |            |                     |            |
| Mn(1)–O(1)          | 2.135(2)   | Mn(1)–O(3)i         | 2.354(2)   | Mn(1)–O(4)i         | 2.314(2)   |
| Mn(1)–O(8)ii        | 2.243(2)   | Mn(1)–O(9)ii        | 2.402(2)   | Mn(1)–N(1)          | 2.299(2)   |
| Mn(1)–N(2)          | 2.264(2)   | Mn(2)–O(2)          | 2.109(2)   | Mn(2)–O(4)i         | 2.321(2)   |
| Mn(2)–O(6)ii        | 2.104(2)   | Mn(2)–O(9)ii        | 2.207(2)   | Mn(2)–N(3)          | 2.228(2)   |
| Mn(2)–N(4)          | 2.249(2)   |                     |            |                     |            |
| O(1)–Mn(1)–O(8)ii   | 85.89(8)   | O(1)–Mn(1)–N(2)     | 89.75(7)   | N(2)–Mn(1)–O(8)ii   | 141.07(8)  |
| O(1)–Mn(1)–N(1)     | 133.88(7)  | N(1)–Mn(1)–O(8)ii   | 84.39(7)   | N(1)–Mn(1)–N(2)     | 71.16(7)   |
| O(4)i–Mn(1)–O(1)    | 81.89(6)   | O(8)ii–Mn(1)–O(4)i  | 129.33(6)  | N(2)–Mn(1)–O(4)i    | 88.01(7)   |
| N(1)–Mn(1)–O(4)i    | 136.29(6)  | O(3)i–Mn(1)–O(1)    | 137.40(6)  | O(8)ii–Mn(1)–O(3)i  | 125.21(8)  |
| O(3)i–Mn(1)–N(2)    | 82.00(7)   | N(1)–Mn(1)–O(3)i    | 82.46(6)   | O(3)i–Mn(1)–O(4)i   | 56.24(5)   |
| O(9)ii–Mn(1)–O(1)   | 91.65(6)   | O(8)ii–Mn(1)–O(9)ii | 55.82(6)   | N(2)–Mn(1)–O(9)ii   | 163.10(7)  |
| N(1)–Mn(1)–O(9)ii   | 118.55(7)  | O(9)ii–Mn(1)–O(4)i  | 75.53(5)   | O(9)ii–Mn(1)–O(3)i  | 85.61(6)   |
| O(6)ii–Mn(2)–O(2)   | 100.31(7)  | O(6)ii–Mn(2)–O(9)ii | 83.88(6)   | O(2)–Mn(2)–O(9)ii   | 96.47(7)   |
| O(6)ii–Mn(2)–N(3)   | 103.71(7)  | O(2)–Mn(2)–N(3)     | 91.50(7)   | N(3)–Mn(2)–O(9)ii   | 167.88(7)  |
| O(6)ii–Mn(2)–N(4)   | 94.10(7)   | O(2)–Mn(2)–N(4)     | 160.98(7)  | O(9)ii–Mn(2)–N(4)   | 97.36(7)   |
| N(3)–Mn(2)–N(4)     | 72.93(7)   | O(6)ii–Mn(2)–O(4)i  | 163.13(6)  | O(4)i–Mn(2)–O(2)    | 81.91(6)   |
| O(9)ii–Mn(2)–O(4)i  | 79.25(6)   | O(4)i–Mn(2)–N(3)    | 92.91(6)   | O(4)i–Mn(2)–N(4)    | 87.91(6)   |
| Mn(2)–O(4)i–Mn(1)   | 97.66(5)   | Mn(2)–O(9)ii–Mn(1)  | 98.30(6)   |                     |            |
| <b>4</b>            |            |                     |            |                     |            |
| Cd(1)–O(1)          | 2.416(5)   | Cd(1)–O(2)          | 2.318(5)   | Cd(1)–O(4)i         | 2.209(5)   |
| Cd(1)–O(8)ii        | 2.334(5)   | Cd(1)–O(9)ii        | 2.339(6)   | Cd(1)–N(1)          | 2.272(6)   |
| Cd(2)–O(6)          | 2.303(4)   | Cd(2)–O(6)iii       | 2.303(4)   | Cd(2)–O(10)         | 2.300(6)   |
| Cd(2)–O(10)iii      | 2.300(6)   | Cd(2)–N(2)          | 2.379(6)   | Cd(2)–N(2)iii       | 2.379(6)   |
| Cd(3)–O(3)          | 2.340(5)   | Cd(3)–O(3)iv        | 2.340(5)   | Cd(3)–O(11)         | 2.329(6)   |
| Cd(3)–O(11)iv       | 2.329(6)   | Cd(3)–N(3)          | 2.317(8)   | Cd(3)–N(3)iv        | 2.317(8)   |
| O(4)i–Cd(1)–N(1)    | 123.3(2)   | O(4)i–Cd(1)–O(2)    | 84.07(19)  | O(2)–Cd(1)–N(1)     | 133.9(2)   |
| O(4)i–Cd(1)–O(8)ii  | 125.7(2)   | O(8)ii–Cd(1)–N(1)   | 96.3(2)    | O(8)ii–Cd(1)–O(2)   | 93.91(18)  |

|                      |            |                     |            |                    |            |
|----------------------|------------|---------------------|------------|--------------------|------------|
| O(4)i–Cd(1)–O(9)ii   | 85.3(2)    | O(9)ii–Cd(1)–N(1)   | 91.9(2)    | O(9)ii–Cd(1)–O(2)  | 129.8(2)   |
| O(8)ii–Cd(1)–O(9)ii  | 55.31(17)  | O(4)i–Cd(1)–O(1)    | 90.5(2)    | N(1)–Cd(1)–O(1)    | 85.5(2)    |
| O(1)–Cd(1)–O(2)      | 55.32(17)  | O(8)ii–Cd(1)–O(1)   | 131.62(19) | O(9)ii–Cd(1)–O(1)  | 172.78(19) |
| O(6)–Cd(2)–O(10)     | 92.9(2)    | O(6)iii–Cd(2)–O(10) | 87.1(2)    | O(10)–Cd(2)–N(2)   | 92.0(2)    |
| O(10)iii–Cd(2)–N(2)  | 88.0(2)    | O(6)–Cd(2)–N(2)     | 88.61(19)  | O(6)iii–Cd(2)–N(2) | 91.39(19)  |
| O(11)iv–Cd(3)–N(3)   | 98.8(3)    | O(11)–Cd(3)–N(3)    | 81.2(3)    | O(3)–Cd(3)–N(3)    | 93.4(2)    |
| O(3)–Cd(3)–N(3)iv    | 86.6(2)    | O(11)iv–Cd(3)–O(3)  | 101.91(18) | O(11)–Cd(3)–O(3)   | 78.09(18)  |
| <b>5</b>             |            |                     |            |                    |            |
| Cd(1)–O(1)           | 2.468(3)   | Cd(1)–O(4)          | 2.402(3)   | Cd(1)–O(3)i        | 2.363(3)   |
| Cd(1)–O(4)i          | 2.402(3)   | Cd(1)–O(6)iii       | 2.264(3)   | Cd(1)–O(8)ii       | 2.341(3)   |
| Cd(1)–O(9)ii         | 2.387(3)   | Cd(2)–O(1)          | 2.291(3)   | Cd(2)–O(2)         | 2.487(4)   |
| Cd(2)–O(6)iii        | 2.339(3)   | Cd(2)–O(10)         | 2.221(4)   | Cd(2)–O(11)        | 2.281(3)   |
| Cd(2)–N(1)           | 2.285(5)   |                     |            |                    |            |
| O(6)iii–Cd(1)–O(8)ii | 97.73(12)  | O(3)i–Cd(1)–O(6)iii | 94.32(12)  | O(3)i–Cd(1)–O(8)ii | 133.79(11) |
| O(4)–Cd(1)–O(6)iii   | 146.01(11) | O(8)ii–Cd(1)–O(4)   | 88.94(11)  | O(3)i–Cd(1)–O(4)   | 104.94(11) |
| O(6)iii–Cd(1)–O(9)ii | 125.94(11) | O(9)ii–Cd(1)–O(8)ii | 55.01(11)  | O(9)ii–Cd(1)–O(3)i | 82.08(12)  |
| O(9)ii–Cd(1)–O(4)    | 84.92(12)  | O(6)iii–Cd(1)–O(4)i | 94.04(12)  | O(8)ii–Cd(1)–O(4)i | 164.07(10) |
| O(3)i–Cd(1)–O(4)i    | 55.33(10)  | O(4)i–Cd(1)–O(4)    | 75.34(12)  | O(9)ii–Cd(1)–O(4)i | 124.51(11) |
| O(6)iii–Cd(1)–O(1)   | 74.03(10)  | O(8)ii–Cd(1)–O(1)   | 85.74(11)  | O(3)i–Cd(1)–O(1)   | 140.38(11) |
| O(1)–Cd(1)–O(4)      | 73.29(10)  | O(9)ii–Cd(1)–O(1)   | 135.57(11) | O(4)i–Cd(1)–O(1)   | 87.23(10)  |
| O(10)–Cd(2)–O(11)    | 96.08(14)  | O(10)–Cd(2)–N(1)    | 95.54(17)  | O(11)–Cd(2)–N(1)   | 87.77(15)  |
| O(10)–Cd(2)–O(1)     | 148.10(14) | O(1)–Cd(2)–O(11)    | 99.65(13)  | N(1)–Cd(2)–O(1)    | 112.58(15) |
| O(10)–Cd(2)–O(6)iii  | 87.66(12)  | O(11)–Cd(2)–O(6)iii | 175.73(13) | N(1)–Cd(2)–O(6)iii | 93.95(13)  |
| O(1)–Cd(2)–O(6)iii   | 76.08(11)  | O(10)–Cd(2)–O(2)    | 100.63(13) | O(11)–Cd(2)–O(2)   | 82.21(13)  |
| N(1)–Cd(2)–O(2)      | 161.76(13) | O(1)–Cd(2)–O(2)     | 54.83(11)  | O(6)iii–Cd(2)–O(2) | 95.09(12)  |

<sup>a</sup> Symmetry codes: **(1)** i:  $x + 1, y, z$ ; ii:  $x + 1, y + 1, z$ ; **(2)** i:  $x + 1, y, z$ ; ii:  $x + 1, y + 1, z$ ; **(3)** i:  $x - 1, y, z$ ; ii:  $x, y + 1, z$ ; **(4)** i:  $x + 1, y, z$ ; ii:  $x + 1, y + 1, z$ ; iii:  $-x + 1, -y, -z + 1$ ; iv:  $-x + 1, -y + 1, -z + 2$ ; **(5)** i:  $-x + 1, -y + 2, -z + 1$ ; ii:  $-x + 1, -y + 1, -z + 2$ ; iii:  $x, y, z - 1$ .

**Table S2** Hydrogen bonds in crystal packing [ $\text{\AA}, ^\circ$ ] for **4** and **5**.

| Compound | D–H $\cdots$ A             | $d(\text{D–H})$ | $d(\text{H}\cdots\text{A})$ | $d(\text{D}\cdots\text{A})$ | $\angle\text{DHA}$ | Symmetry code            |
|----------|----------------------------|-----------------|-----------------------------|-----------------------------|--------------------|--------------------------|
| <b>4</b> | O(10)–H(1W) $\cdots$ O(7)  | 0.850           | 1.866                       | 2.716                       | 179.58             | $-x + 1, -y, -z + 1$     |
|          | O(10)–H(2W) $\cdots$ O(12) | 0.850           | 2.016                       | 2.866                       | 179.72             | $-x + 2, -y + 1, -z + 1$ |
|          | O(11)–H(4W) $\cdots$ N(4)  | 0.850           | 1.849                       | 2.699                       | 178.08             | $x, y - 1, z$            |
|          | O(12)–H(5W) $\cdots$ O(6)  | 0.850           | 2.049                       | 2.899                       | 179.09             | $x, y + 1, z$            |
|          | O(12)–H(6W) $\cdots$ O(13) | 0.884           | 1.880                       | 2.752                       | 168.59             | $x + 1, y, z$            |
|          | O(13)–H(7W) $\cdots$ O(2)  | 0.850           | 2.125                       | 2.975                       | 179.60             | $x - 1, y, z$            |
|          | O(13)–H(8W) $\cdots$ O(7)  | 0.900           | 2.490                       | 3.386                       | 174.09             | $x, y + 1, z$            |
| <b>5</b> | O(10)–H(1W) $\cdots$ O(8)  | 0.850           | 1.872                       | 2.722                       | 179.20             | $x + 1, y, z - 1$        |
|          | O(11)–H(3W) $\cdots$ O(9)  | 0.849           | 1.865                       | 2.693                       | 164.50             | $-x + 2, -y + 1, -z + 2$ |
|          | O(11)–H(4W) $\cdots$ O(1)  | 0.829           | 2.271                       | 3.057                       | 158.49             | $-x + 2, -y + 2, -z + 1$ |

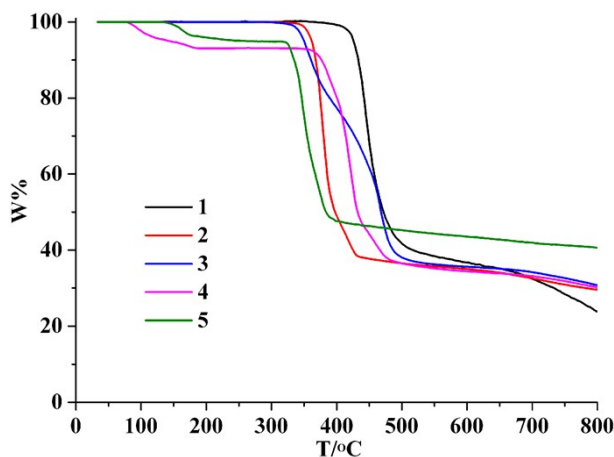

**Fig. S1.** TGA curves for **1–5**.

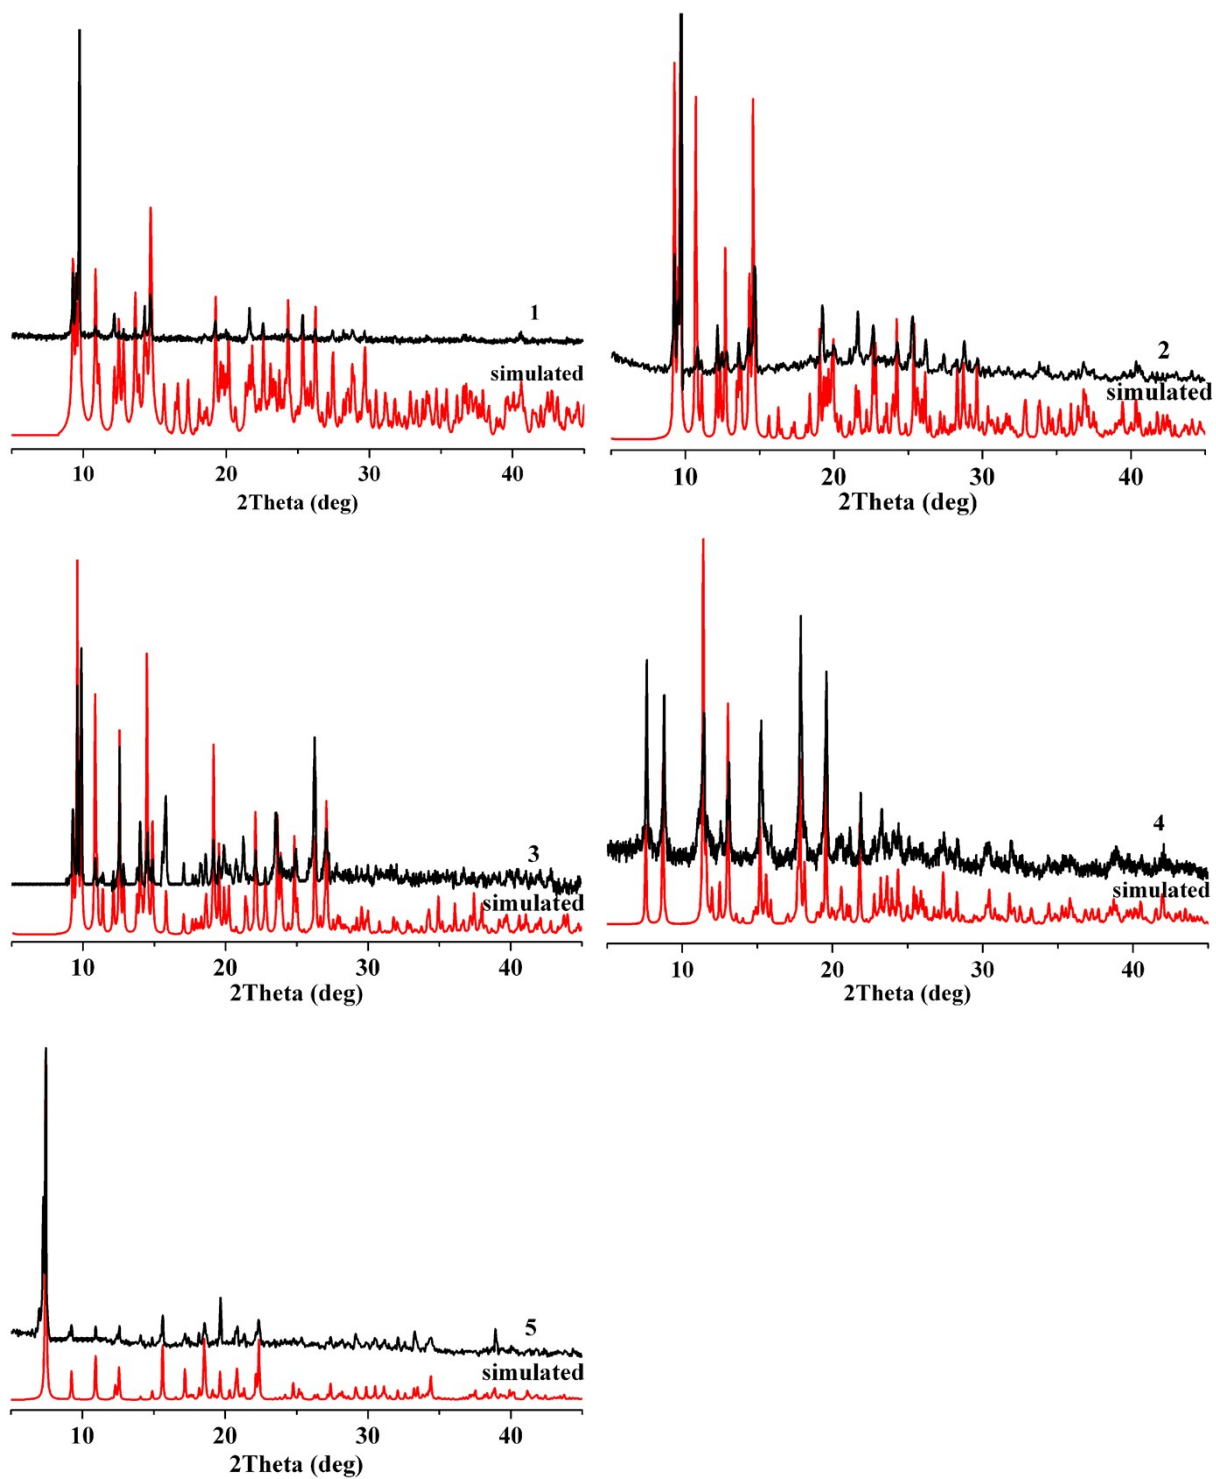

**Fig. S2.** PXR D patterns of compounds 1–5 at room temperature. Black patterns correspond to the experimental data obtained using the as-synthesized bulk samples. Red patterns were simulated from the single crystal X-ray data.

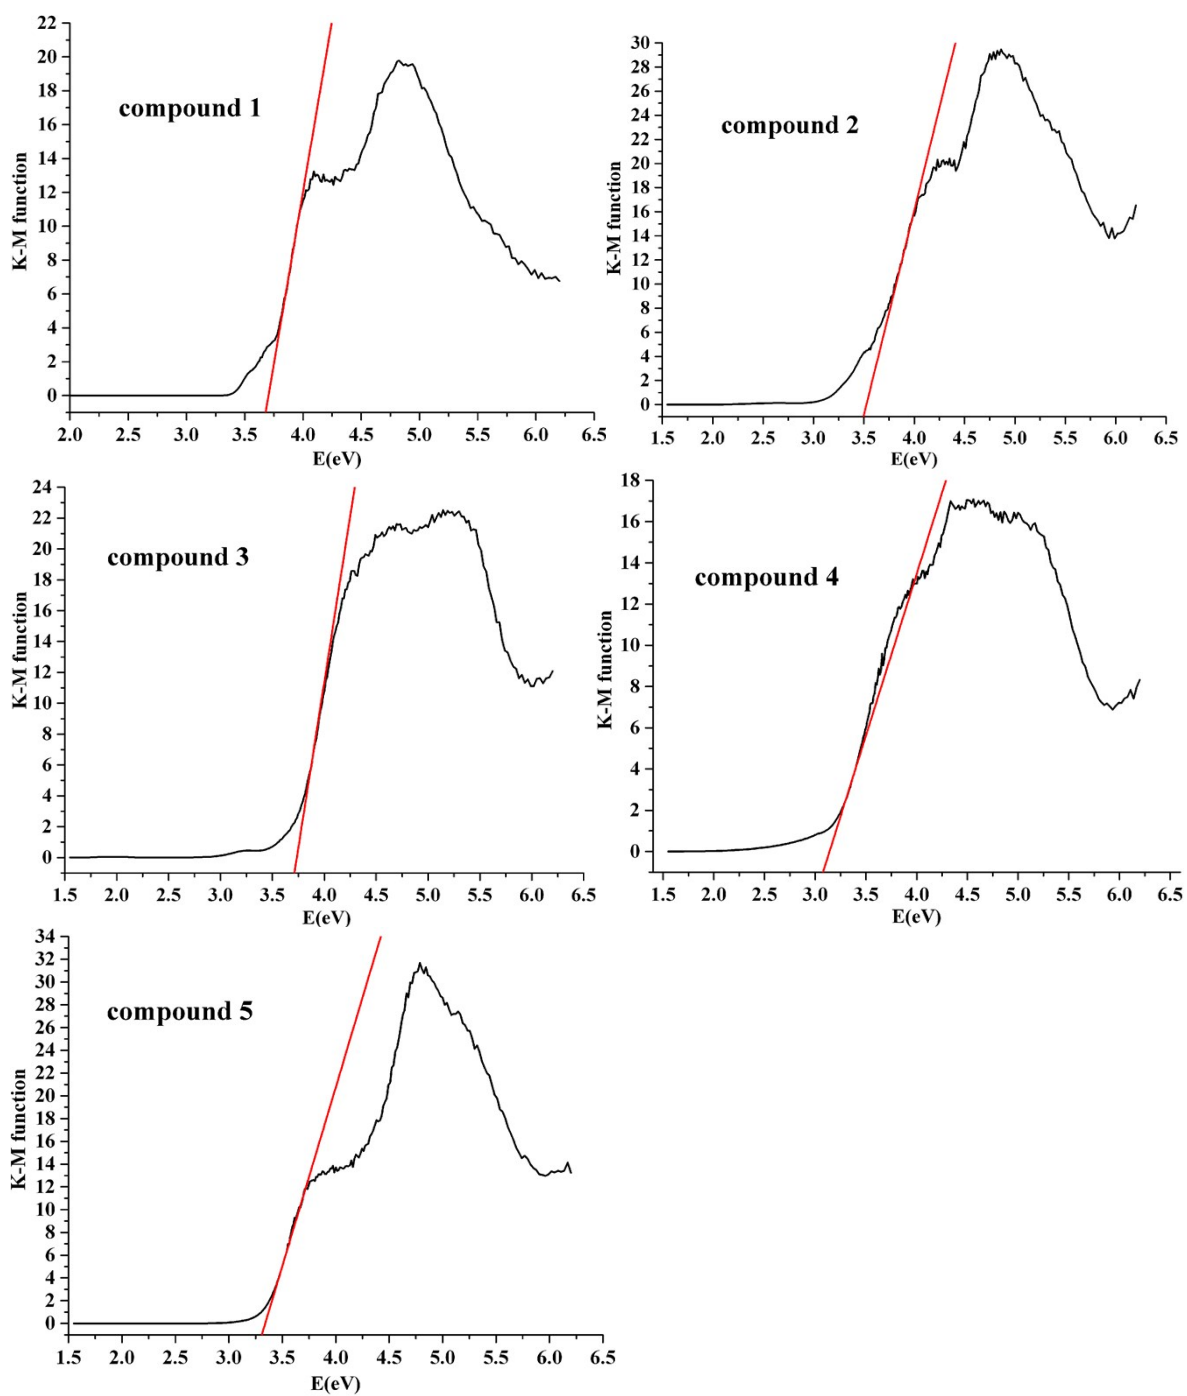

**Fig. S3.** Kubelka-Munk-transformed diffuse reflectance spectra for 1–5.

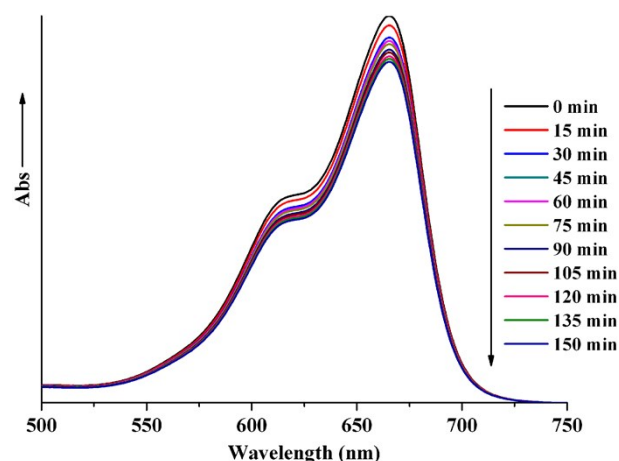

**Fig. S4.** Time-dependent UV-Vis spectra of the reaction mixture in the course of the MB photodegradation (blank test without catalyst). Reaction conditions: 100 mL aqueous solution, MB (1 mg), under 125 W Hg lamp irradiation.

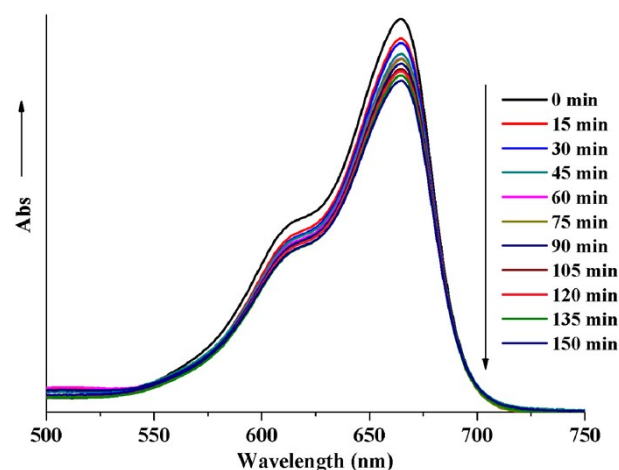

**Fig. S5.** Time-dependent UV-Vis spectra of the reaction mixture in the course of the MB photodegradation catalyzed by H<sub>4</sub>deta (blank test). Reaction conditions: H<sub>4</sub>deta (50 mg), 100 mL aqueous solution, MB (1 mg), under 125 W Hg lamp irradiation.

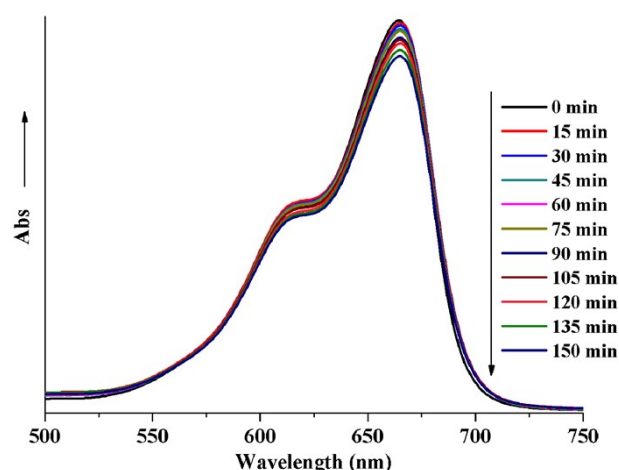

**Fig. S6.** Time-dependent UV-Vis spectra of the reaction mixtures in the course of the MB photodegradation catalyzed by 4,4'-bipy (blank test). Reaction conditions: 4,4'-bipy (50 mg), 100 mL aqueous solution, MB (1 mg), under 125 W Hg lamp irradiation.

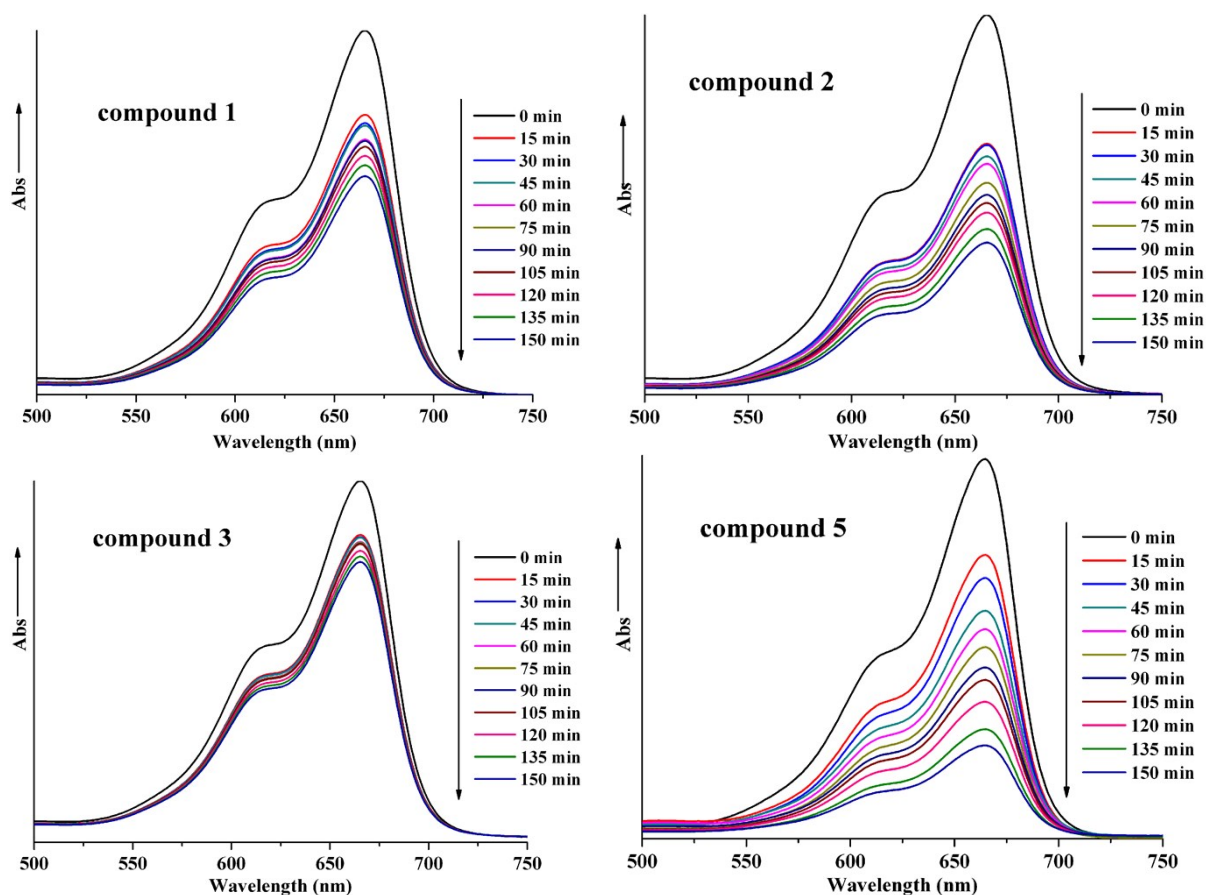

**Fig. S7.** Time-dependent UV-Vis spectra of the reaction mixtures in the course of the MB photodegradation catalyzed by 1–3 and 5. Reaction conditions: catalyst (50 mg), 100 mL aqueous solution, MB (1 mg), under 125 W Hg lamp irradiation.

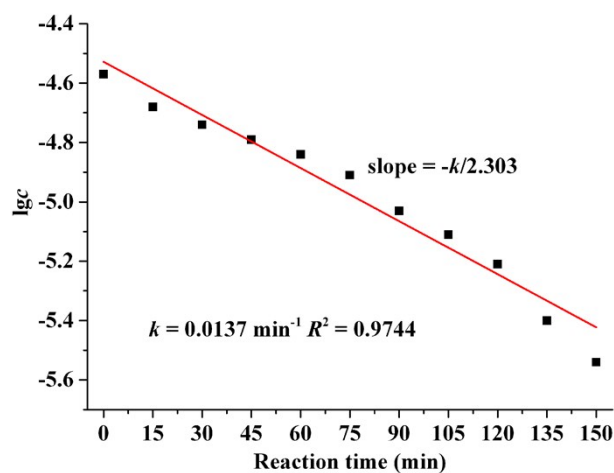

**Fig. S8.** Relationship between  $\lg[c]$  and reaction time in the course of the MB photodegradation catalyzed by 4. The red line corresponds to a linear fit. Reaction conditions: catalyst (50 mg), 100 mL aqueous solution, MB (1 mg), under 125 W Hg lamp irradiation.

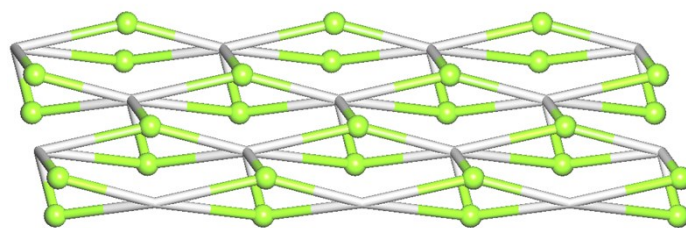

**Fig. S9.** Alternative topological view of a binodal 3,6-connected 2D layer with a 3,6L66 topology in **1**; rotated view along the *b* axis; 3-connected Mn centers (green balls), centroids of  $\mu_6$ -deta<sup>4-</sup> blocks (gray).

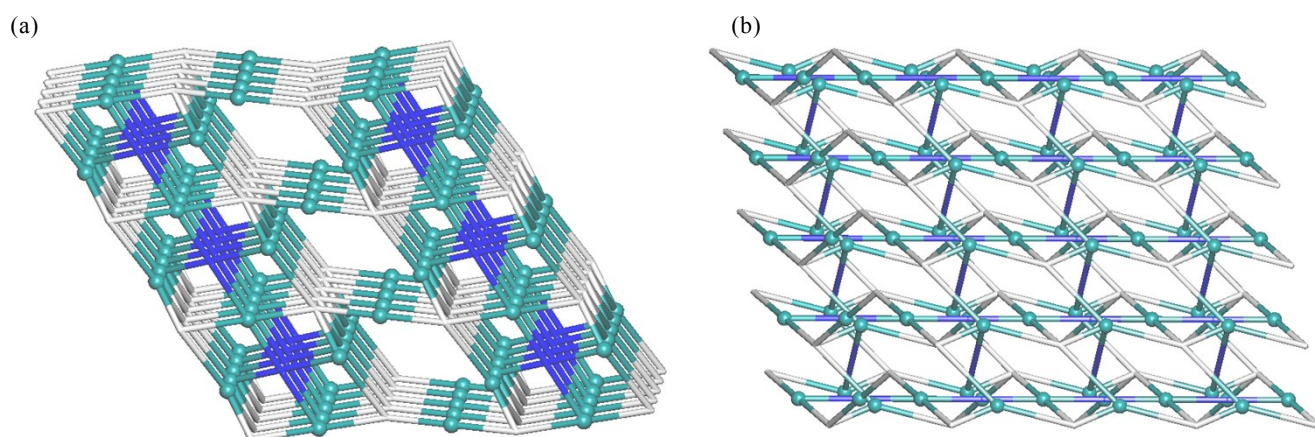

**Fig. S10.** Alternative topological views of a trinodal 4,4,5-connected 3D net in **4** with a unique topology; representation along the *a* (a) and *c* (b) axis; 2-connected Cd3 and 4-connected Cd1/Cd2 centers (turquoise balls), centroids of 5-connected  $\mu_5$ -deta<sup>4-</sup> blocks (gray), centroids of 2-connected  $\mu$ -4,4'-bipy linkers (blue).

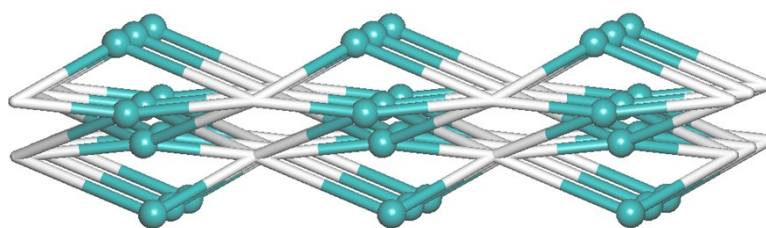

**Fig. S11.** Alternative topological view of a binodal 4,6-connected layer in **5** with a 4,6L45 topology; rotated view along the *b* axis; 4-connected Cd1 and 2-connected Cd2 centers (turquoise balls), centroids of  $\mu_6$ -deta<sup>4-</sup> blocks (gray).
